1 **Title: Experimental considerations for study of *C. elegans* lysosomal proteins**

2 John C. Clancy<sup>1\*</sup>, An A. Vo<sup>1\*</sup>, Max T. Levenson<sup>1</sup>, James Matthew Ragle<sup>1</sup>, and Jordan D.  
3 Ward<sup>1‡</sup>

4

5 <sup>1</sup>Department of Molecular, Cell, and Developmental Biology, University of California-  
6 Santa Cruz, Santa Cruz, CA 95064, USA.

7 ‡Author for correspondence.

8 \*Equal contribution

9

10 Corresponding author email: [jward2@ucsc.edu](mailto:jward2@ucsc.edu)

11

12 Keywords: *C. elegans*, lysosome, Gamillus, western blot

13

14 Running Title: *C. elegans* lysosome considerations

15

16 **ABSTRACT**

17 Lysosomes are an important organelle required for the degradation of a range of cellular  
18 components. Lysosome function is critical for development and homeostasis as  
19 dysfunction can lead to inherited genetic disorders, cancer, and neurodegenerative and  
20 metabolic disease. The acidic and protease-rich environment of lysosomes poses  
21 experimental challenges. Many fluorescent proteins are quenched or degraded, while  
22 specific red fluorescent proteins can be cleaved from translational fusion partners and  
23 accumulate. While studying MLT-11, a *C. elegans* molting factor that localizes to  
24 lysosomes and the extracellular matrix, we sought to optimize several experimental  
25 parameters. We found that mScarlet fusions to MLT-11 missed apical extracellular matrix  
26 and rectal epithelial localization in contrast to mNeonGreen fusions. Rapid sample lysis  
27 and denaturation was critical for preventing MLT-11 fragmentation while preparing lysates  
28 for western blots. Using a model lysosomal substrate (NUC-1) we found that rigid  
29 polyproline linkers and truncated mCherry constructs do not prevent cleavage of mCherry  
30 from NUC-1. We provide evidence that extended localization in lysosomal environments  
31 prevents the detection of FLAG epitopes in western blots. Finally, we optimize an acid-  
32 tolerant green fluorescent protein (Gamillus) for use in *C. elegans*. These experiments  
33 provide important experimental considerations and new reagents for the study of *C.*  
34 *elegans* lysosomal proteins.

35

36

37

38

## 39 INTRODUCTION

40 Lysosomes are membrane-enclosed cytoplasmic organelles required for the degradation  
41 of diverse biological macromolecules (Ballabio and Bonifacino 2020). Consistent with this  
42 function, they are the most acidic compartment in the cell with a pH ranging from 4.5-5.5,  
43 and are packed with proteases, nucleases, acid lipases, and carbohydrate processing  
44 enzymes (Bonam *et al.* 2019). Lysosome dysfunction can lead to inherited lysosomal  
45 storage disorders as well as neurodegenerative and metabolic disease, and cancer  
46 (Ballabio and Bonifacino 2020). Lysosome activity declines with age and is required for  
47 lifespan extension (Hansen *et al.* 2008; Sun *et al.* 2020).

48

49 Using fluorescent protein (FP) fusions to study lysosomal luminal proteins presents  
50 challenges. Many green and red fluorescent proteins derived from avGFP and eqFP578,  
51 respectively, are sensitive to degradative lysosomal proteases (Shinoda *et al.* 2018b).  
52 The sensitivity of many other FPs to lysosomal proteases remains to be determined  
53 (Shinoda *et al.* 2018b). Due to their low pKa (3.1-5.3) and resistance to lysosomal  
54 proteases, red FPs derived from DsRed or eqFP611 (ie. mCherry, mScarlet, mRuby) are  
55 typically the FP of choice for imaging lysosome luminal proteins (Shinoda *et al.* 2018b).  
56 An additional consideration in interpreting lysosomal localization is that lysosomal  
57 proteases can cleave flexible linkers or the N-terminus of fluorescent proteins, separating  
58 the FP from the protein of interest (Ko *et al.* 2003; Kollmann *et al.* 2005; Huang *et al.*  
59 2014; Miao *et al.* 2020). While this cleavage can be used to monitor lysosomal activity  
60 (Miao *et al.* 2020), it can hamper interpretation of lysosomal localization of fusion proteins.  
61 Another issue is that many FPs lose fluorescence in the acidic lysosome through  
62 fluorophore quenching due to their neutral pKa (Shinoda *et al.* 2018b). Acid-tolerant green  
63 FPs have been recently developed, but have not yet been widely adopted (Roberts *et al.*  
64 2016; Shinoda *et al.* 2018b).

65

66 During the course of studying MLT-11, a *C. elegans* protease inhibitor (Ragle *et al.* 2022),  
67 we used CRISPR/Cas9 to introduce an C-terminal mScarlet::3xMyc tag into the  
68 endogenous *mlt-11* locus. This strain displayed robust MLT-11::mScarlet::3xMyc  
69 lysosomal localization. However, we were unable to verify the fusion was full-length by

70 anti-Myc western blotting. We also generated an equivalent MLT-  
71 11::mNeonGreen::3xFLAG fusion without a linker (Ragle et al. 2022), which displayed  
72 similar lysosomal localization, but also transient apical extracellular matrix (aECM)  
73 localization. This discrepancy between these strains motivated us to explore whether we  
74 could minimize cleavage of the fluorescent protein fusion and explore acid-tolerant green  
75 FPs for lysosomal translational fusions.

76

77

## 78 MATERIALS AND METHODS

### 79 Strains and culture

80 *C. elegans* were cultured as originally described (Brenner 1974), except worms were  
81 grown on MYOB media instead of NGM. MYOB agar was made as previously described  
82 (Church *et al.* 1995). We obtained wild type N2 animals from the *Caenorhabditis* Genetics  
83 Center.

### 84 Strains generated for this study:

| Strain | Construction   | Genotype                                                                           |
|--------|----------------|------------------------------------------------------------------------------------|
| JDW206 | CRISPR/Cas9    | <i>mlt-11(wrd41[mlt-11::30x linker-mScarlet^3xMyc])</i>                            |
| JDW254 | Crossing       | <i>qxls630[scav-3::GFP] ; mlt-11(wrd41[mlt-11::30x linker-mScarlet-3xMyc]) V</i>   |
| JDW288 | Microinjection | <i>wrdEx16[hsp-16.2p::nuc-1::linker::Gamillus::linker::mCherry::tbb-2 3'UTR]</i>   |
| JDW289 | Microinjection | <i>wrdEx17[hsp-16.2p::nuc-1::linker::Gamillus::linker::mCherry::tbb-2 3'UTR]</i>   |
| JDW304 | Microinjection | <i>wrdEx20[hsp-16.41p::nuc-1::linker::Gamillus::linker::mScarlet::tbb-2 3'UTR]</i> |

|        |                    |                                                                                                                  |
|--------|--------------------|------------------------------------------------------------------------------------------------------------------|
| JDW305 | Microinjection     | <i>wrdEx21[hsp-16.41p::nuc-1::linker::Gamillus::linker::mScarlet::tbb-2 3'UTR]</i>                               |
| JDW337 | Microinjection     | <i>glh-1(wrd65[glh-1::Gamillus]) I</i>                                                                           |
| JDW338 | Microinjection     | <i>glh-1(wrd66[GFP::glh-1]) I</i>                                                                                |
| JDW372 | CRISPR/Cas9        | <i>his-72(wrd75[his-72::Gamillus]) III</i>                                                                       |
| JDW373 | CRISPR/Cas9        | <i>lmn-1(wrd76[lmn-1::Gamillus]) I</i>                                                                           |
| JDW391 | Ragle et al., 2022 | <i>mlt-11(wrd86[C-terminal mNeonGreen::3xFLAG]) V</i>                                                            |
| JDW379 | RMCE               | <i>jsTi1493 {mosL loxP [wrdSi70(mlt-11p (-2.8 kb)::nuc-1::mCherry-tbb-2 3'UTR)] FRT3::mosR} IV</i>               |
| JDW382 | RMCE               | <i>jsTi1493 {mosL loxP [wrdSi71(mlt-11p (-2.8 kb)::nuc-1::P5::crmCherry::3xFLAG-tbb-2 3'UTR)] FRT3::mosR} IV</i> |

85

86 **Strains provided by the *Caenorhabditis* Genetics Center:**

| Strain | Genotype                                                                                  |
|--------|-------------------------------------------------------------------------------------------|
| N2     | Wild type                                                                                 |
| NM5179 | <i>jsTi1493 [mosL loxP mex-5p FLP sl2 mNeonGreen rpl-28p FRT GFP-HIS-58 FRT3 mosR] IV</i> |
| XW8056 | <i>qxIs630[scav-3::GFP]</i>                                                               |

87

88 **Molecular biology and generation of transgenic animals**

89 All plasmids used are listed in Table S1. Annotated plasmid sequence files are provided  
90 in File S1. Specific cloning details and primers used are available upon request. An *hsp-*  
91 *16.41::linker::Gamillus::linker::mCherry::tbb-2 3'UTR* cassette was synthesized and  
92 cloned (Twist Bioscience) to create pJW2138 (Table S1). *nuc-1* coding sequence was  
93 Gibson cloned into this vector to create pJW2139 (Table. S1; *hsp-16.41::nuc-*

94 *1::linker::Gamillus::linker::mCherry::tbb-2 3'UTR*). This plasmid was injected at 50 ng/μl  
95 along with a pCFJ90 (*myo-2p::mCherry*) co-injection marker at 10 ng/μl (Frøkjær-Jensen  
96 *et al.* 2008); two independent lines carrying extrachromosomal arrays were generated  
97 (JDW288 and JDW289). The mCherry cassette in pJW2139 was replaced with mScarlet  
98 through Gibson cloning to create pJW2145. This plasmid was injected at 50 ng/μl along  
99 with a *myo-2p::mCherry* co-injection marker at 5 ng/μl and two independent lines carrying  
100 extrachromosomal arrays were generated (JDW304 and JDW305). We used Q5 site-  
101 directed mutagenesis (NEB) on pJW2139 to truncate mCherry, remove Gamillus and  
102 replace the linker with a rigid penta-proline linker to generate pJW2201. A 3xFLAG tag  
103 was added by Gibson cloning to create pJW2204 (Table S1; *hsp-16.41p::nuc-1::P5*  
104 *linker::crmCherry::tbb-2 3'UTR*). The *nuc-1::P5 linker::crmCherry::3xFLAG::tbb-2 3'UTR*  
105 cassette was PCR amplified and ATG and GTA connectors for SapTrap cloning were  
106 added (Schwartz and Jorgensen 2016). This PCR product was Gibson cloned to create  
107 pJW2325. *nuc-1* and *linker::mCherry::tbb-2 3'UTR* fragments were PCR amplified from  
108 pJW2139 and ATG and GTA SapTrap connectors were added (Schwartz and Jorgensen  
109 2016). These products were Gibson cloned to create pJW2322. A 2.8 kb *mlt-11* promoter  
110 fragment PCR amplified with SapTrap TGG and ATG connectors and Gibson cloned to  
111 generate pJW2286. Integration vectors (pJW2328, pJW2331) for recombination-  
112 mediated cassette exchange (RMCE) were created by SapTrap with a pLF3FShC  
113 backbone (Schwartz and Jorgensen 2016; Nonet 2020). JDW379 and 382 were created  
114 by RMCE using strain NM5179 and pJW2328 and pJW2331, respectively (Nonet 2020).  
115  
116 JDW206 was created using CRISPR/Cas9-mediated genome editing with a pJW1897  
117 repair template and a pJW1896 sgRNA plasmid. Knock-ins were generated and the self-  
118 excising cassette was excised as previously described (Dickinson *et al.* 2015). pJW1896  
119 was created by SapTrap using a pJW1839 backbone (Schwartz and Jorgensen 2016;  
120 Ashley *et al.* 2021). pJW1896 was created by SapTrap with 600 bp 5' and 3' homology  
121 arms and a pJW1821 (30 amino acid linker::mScarlet (GLO)<sup>SEC</sup> Lox5111<sup>3xMyc</sup>)  
122 cassette (Schwartz and Jorgensen 2016; Ashley *et al.* 2021).

123

124

## 125 **Microscopy**

126 Animals were picked into a 5  $\mu$ l drop of M9 + 0.05% with levamisole solution on a 2%  
127 agarose pad on a microscope slide, then a coverslip was placed on the pad. Images were  
128 acquired using a Plan-Apochromat 40x/1.3 Oil DIC lens or a Plan-Apochromat 63x/1.4  
129 Oil DIC lens on an Axiomager M2 microscope (Carl Zeiss Microscopy, LLC) equipped  
130 with a Colibri 7 LED light source and an Axiocam 506 mono camera. Acquired images  
131 were processed through Fiji software (version: 2.0.0-rc-69/1.52p). For direct comparisons  
132 within a figure, we set the exposure conditions to avoid pixel saturation of the brightest  
133 sample and kept equivalent exposure for imaging of the other samples.

134

## 135 **Western blotting**

136 For the western blot in Fig. 2, JDW391 animals were synchronized by alkaline bleaching  
137 ([dx.doi.org/10.17504/protocols.io.j8nlkkyxdl5r/v1](https://doi.org/10.17504/protocols.io.j8nlkkyxdl5r/v1)) and released on MYOB plates.  
138 Animals were harvested at 42 hours post-release by picking thirty animals into 30  $\mu$ l of  
139 M9+0.05% gelatin. Samples were processed as described in Fig 2A. For all other western  
140 blots, forty animals were picked into 40  $\mu$ l of M9+0.05% gelatin and Laemmli sample  
141 buffer was added to 1X and then immediately incubated for five minutes at 95°C. Lysates  
142 were then stored at -80°C until they were resolved by SDS-PAGE. For the western blots  
143 in Figure 3, animals were synchronized by bleaching and harvested at the indicated times.  
144 Lysates were resolved using precast 4-20% MiniProtean TGX Stain Free Gels (Bio-Rad)  
145 with a Spectra™ Multicolor Broad Range Protein Ladder (Thermo; # 26623) protein  
146 standard. Proteins were transferred to a polyvinylidene difluoride membrane by semi-dry  
147 transfer with a TransBlot Turbo (Bio-Rad). Blots and washes were performed as  
148 previously described. Anti-FLAG blots used horseradish peroxidase (HRP) conjugated  
149 anti-FLAG M2 (Sigma-Aldrich, A8592-5x1MG, Lot #SLCB9703) at a 1:2000 dilution.

150

151 Mouse anti-alpha-Tubulin 12G10 (Developmental Studies Hybridoma Bank; “-c”  
152 concentrated supernatant) was used at 1:4000. Rabbit anti-mCherry (AbCam ab167453)  
153 was used at 1:1000. The secondary antibodies were Digital anti-mouse (Kindle  
154 Biosciences LLC, R1005) diluted 1:20,000 or Digital anti-Rabbit (Kindle Biosciences LLC,  
155 R1006) diluted 1:1000. Blots were incubated for 5 minutes with 1 ml of Supersignal West

156 Femto Maximum Sensitivity Substrate (Thermo Fisher Scientific, 34095) and the final blot  
157 were imaged using the 'chemi high-resolution' setting on a Bio-Rad ChemiDoc MP  
158 System.

159

160 **Data availability** Strains and plasmids are available upon request. Supplemental files  
161 available at FigShare. Plasmid sequences are provided in File S1.

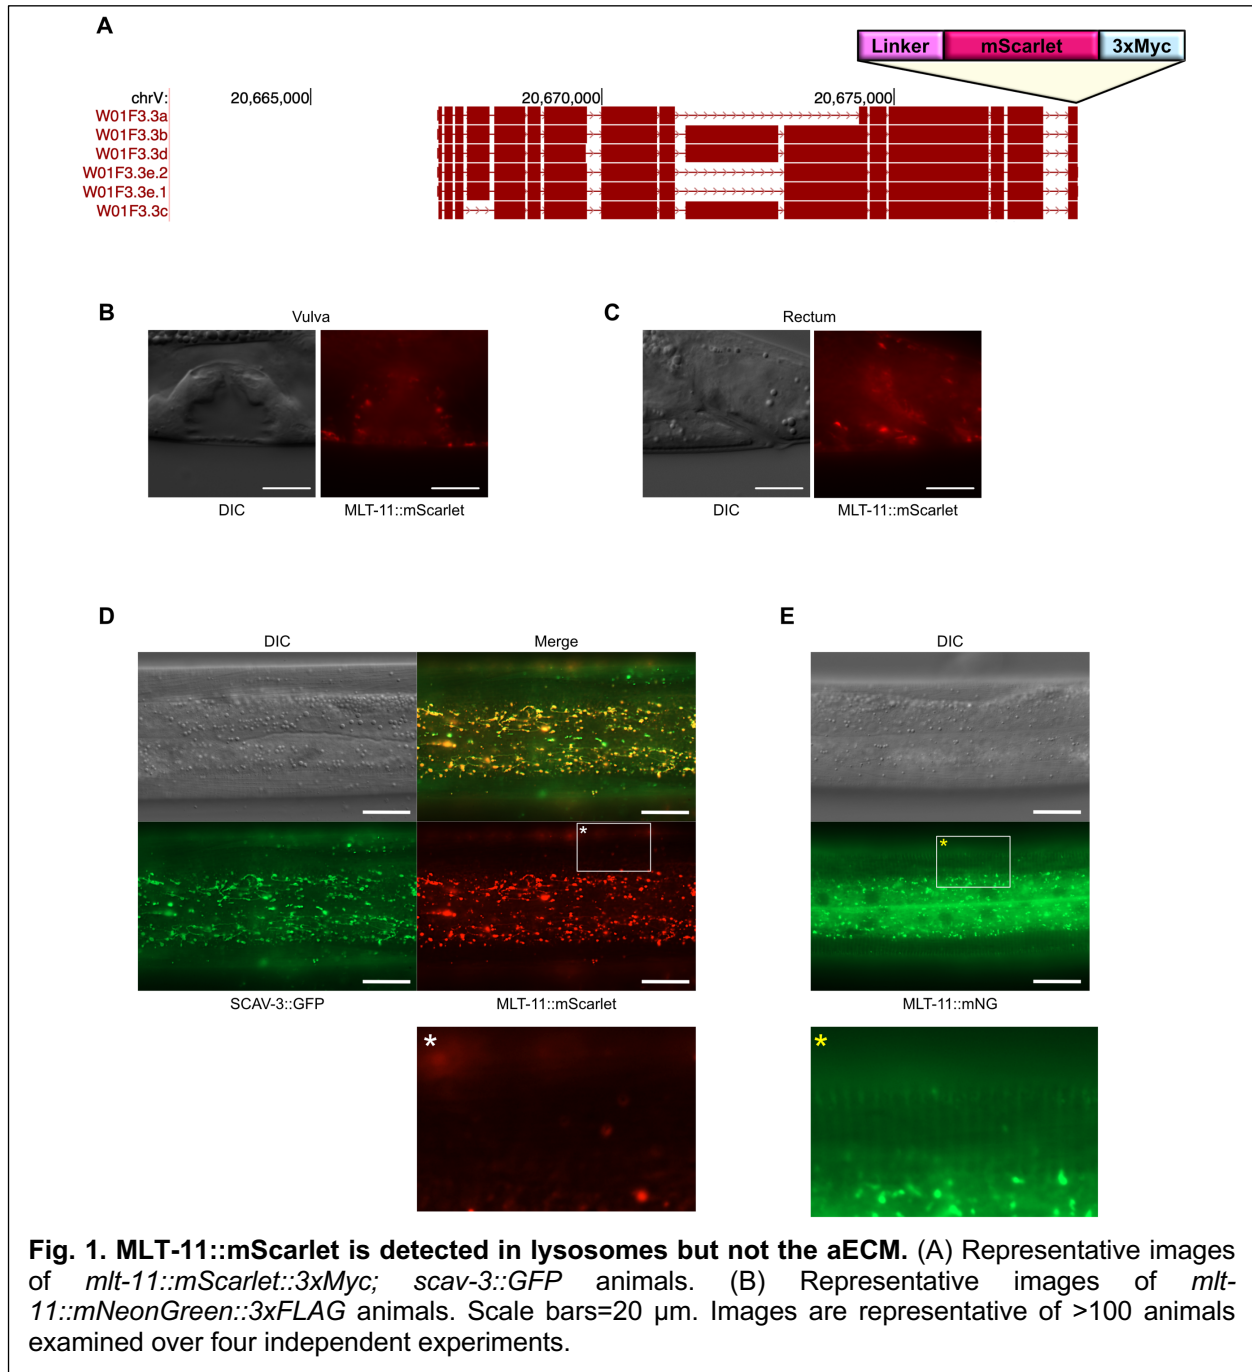



## 162 RESULTS

### 163 **MLT-11::Scarlet localizes to lysosomes and the vulva but not the aECM or rectal** 164 **lining**

165 We recently demonstrated that *C. elegans* MLT-11 is an oscillating secreted protein that  
166 localizes in the apical ECM and lysosomes (Ragle et al. 2022). Our initial attempts at  
167 generating a MLT-11 translational reporter involved inserting an mScarlet::3xMyc  
168 cassette with a flexible 30 amino acid linker to C-terminally tag all known *mIt-11* isoforms  
169 (Fig. 1A). This knock-in displayed vulval localization (Fig. 1B) similar to the MLT-  
170 11::mNeonGreen::3xFLAG (MLT-11::mNG) fusion (Ragle et al. 2022). While we  
171 observed MLT-11::mScarlet in rectal epithelial cells (Fig. 1C), we did not observe it lining  
172 the rectum as we did for the MLT-11::mNG fusion (Ragle et al. 2022). There was robust  
173 MLT-11::mScarlet expression in the hypodermis with a range of expression patterns  
174 ranging from punctate to a mesh like network (Fig 1D). This pattern resembled NUC-  
175 1::mCherry expression (Miao et al. 2020), suggesting MLT-11::mScarlet localized to  
176 lysosomes. Accordingly, MLT-11::mScarlet co-localized with the lysosomal marker,  
177 SCAV-3::GFP (Fig 1D). We observed a similar lysosomal localization of MLT-11::mNG  
178 (Fig. 1E), but also aECM expression that was not observed for MLT-11::Scarlet (Fig. 1D,  
179 E). These data highlight that mNG and mScarlet fusions to equivalent positions in a  
180 protein can produce different localization patterns.

181

### 182 **Sample processing affects MLT-11::mNG stability in lysate generation**

183 As fluorescent tags can be cleaved off fusion proteins in lysosomes (Miao et al. 2020),  
184 western blotting to confirm that a fusion protein is full-length is essential to have high  
185 confidence in lysosomal localization. For our *mIt-11::mScarlet::3xMyc* strain we were  
186 never able to detect bands of the predicted size by western blotting with anti-Myc or anti-  
187 mScarlet antibodies (unpublished data). When attempting western blots on *mIt-11::mNeonGreen::3xFLAG*  
188 lysates we saw variable laddering (for example see Fig 2B, lane C). As lysosomal proteases can degrade proteins, we sought to optimize our sample  
189 preparation conditions to minimize degradation. We harvested samples at peak MLT-11  
190 expression (42 hours post-release, stage L4.3 (Mok et al. 2015; Ragle et al. 2022), and  
191 tested a range of variables: i) denaturation at 70°C for 10 minutes vs 95°C for 5 minutes  
192

193 ii) denaturing samples immediately after collection vs. rapid freezing and denaturation of  
 194 all samples together later; iii) rapid freezing using dry ice vs liquid nitrogen; and iv)  
 195 whether it was better to denature before storage at -80°C vs denature immediately before  
 196 resolving samples by SDS-PAGE (Fig. 2A). The best approach was to harvest animals,  
 197 add Laemmli sample buffer and immediately denature before storage at -80°C (Fig. 2B  
 198 lane D and H). Denaturation at 95°C for 5 minutes produced less laddering than heating

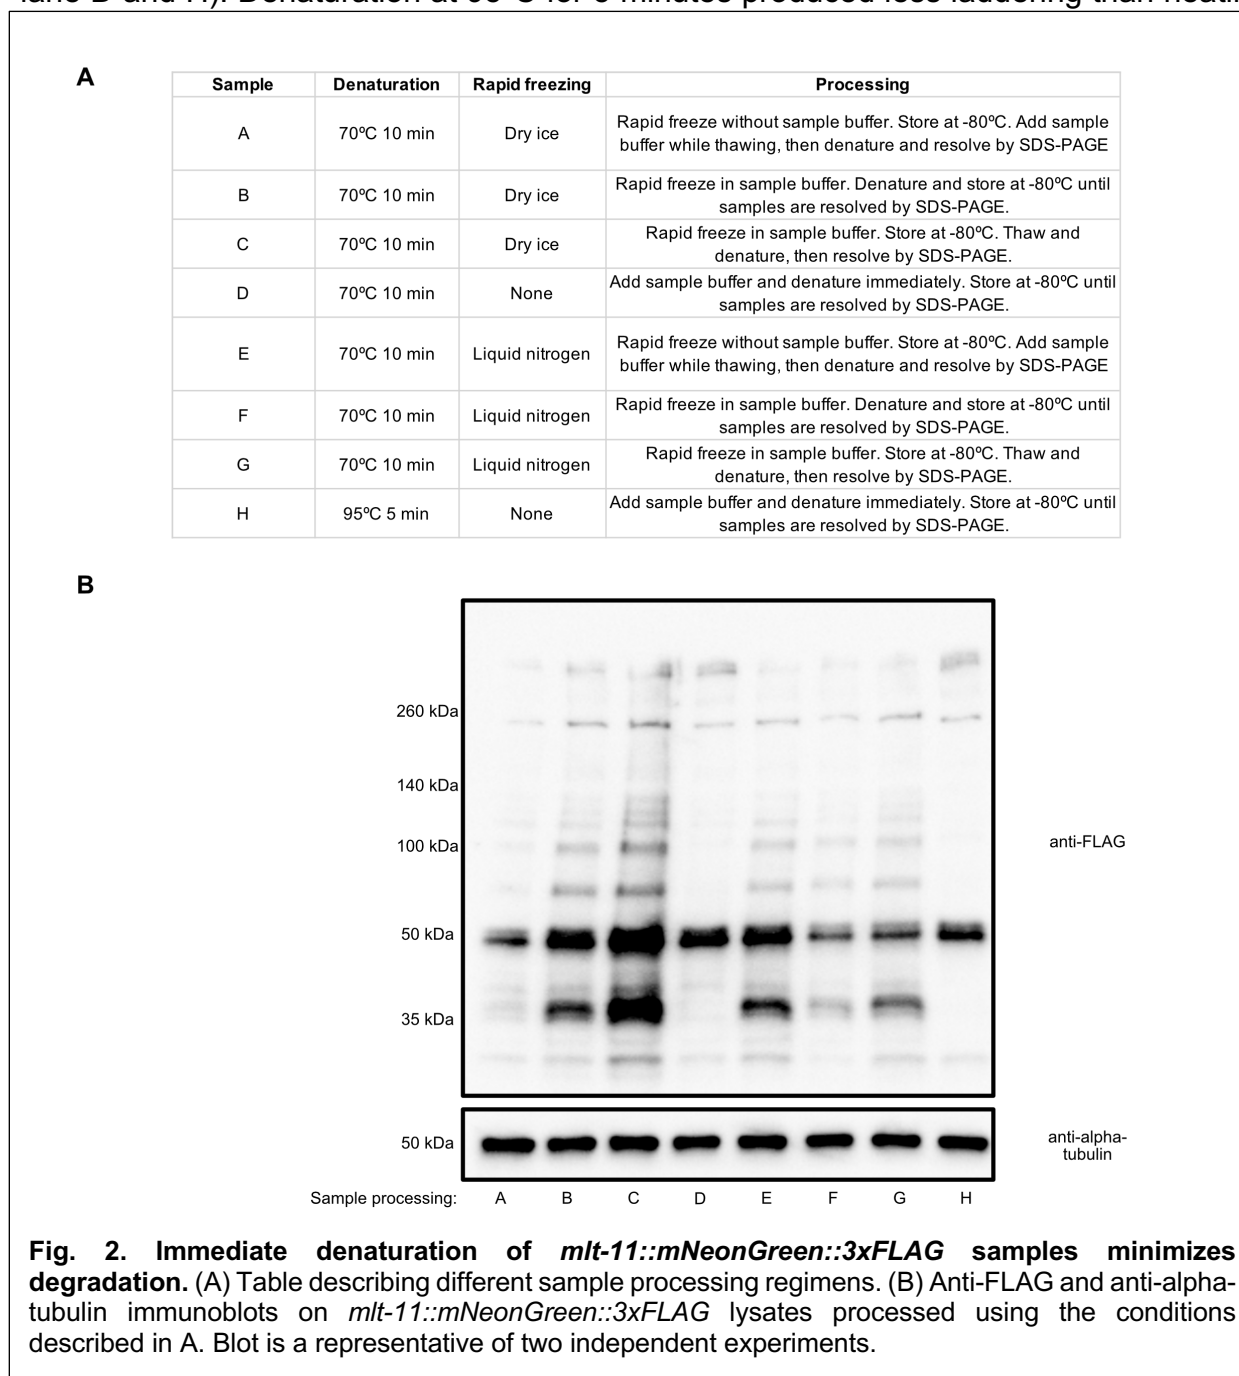

199 to 70°C for 10 minutes (Fig 2B compare D to H). The other approaches with various  
200 combinations of rapid freezing and denaturation all produced more degradation products  
201 above 50 kDa (Fig. 2B). In all conditions there is a strong band at 50 kDa (Fig. 2B),  
202 consistent with a C-terminal MLT-11 fragment we previously observed (Ragle et al.,  
203 2022). These experiments demonstrate that sample preparation has a significant effect  
204 on MLT-11 stability during preparation of lysates for immunoblotting.

205

### 206 **Proline linkers and truncated mCherry does not reduce tag cleavage**

207 As red FPs are stable in lysosomes and linkers can be cleaved by lysosomal proteases  
208 (Shinoda *et al.* 2018b), red FP accumulation might not reflect true localization of a fusion  
209 protein. We therefore tested whether we could design FP fusions that underwent minimal  
210 cleavage. We used a well-characterized *nuc-1::mCherry* translational fusion as our test  
211 case, expressing it in hypodermal and seam cells with a strong *mlt-11* promoter (Ragle  
212 et al. 2022). NUC-1::mCherry is cleaved by lysosomal proteases and this cleavage is  
213 more frequent when lysosomes acidify during molting (Miao *et al.* 2020). In mammalian  
214 cells, rigid linkers comprised of five prolines (P5) helps minimize lysosomal cleavage, as  
215 does removing the eleven N-terminal amino acids of mCherry to make a cleavage  
216 resistant version (crmCherry)(Huang *et al.* 2014). To test whether these modifications  
217 reduce NUC-1::mCherry cleavage in *C. elegans* lysosomes, we generated *mlt-11p::nuc-*  
218 *1::P5::crmCherry::3xFLAG* single-copy transgenes. We also generated a *mlt-11p::nuc-*  
219 *1::mCherry* strain with the equivalent linker (GGGSRGGTR) used in the *nuc-1::mCherry*  
220 constructs of Miao *et al.* (2020). We harvested synchronized mid-L4 larvae, late-L4  
221 larvae, and adults for imaging. For both strains, we observed robust lysosomal mCherry  
222 at all timepoints (Fig. 3B). We also collected animals for western blot analysis. NUC-  
223 1::mCherry and NUC-1::P5::crmCherry::3xFLAG displayed similar punctate and tubular  
224 localization at each timepoint (Figure 3B). We observed similar cleavage levels of NUC-  
225 1::mCherry and NUC-1::P5::crmCherry::3xFLAG, suggesting that the P5 linker and N-  
226 terminal truncation were not effective at preventing cleavage of the mCherry tag (Figure  
227 3A). The NUC-1::mCherry control displayed increased cleavage in late-L4 larvae, similar  
228 to previous reports (Miao *et al.* 2020). NUC-1::P5::crmCherry::3xFLAG displayed a  
229 unique cleavage product compared to NUC-1::mCherry, suggesting that the P5 linker, the

230 N-terminal truncation, and/or the FLAG tag were causing cleavage within NUC-1 (Figure  
 231 3A).  
 232

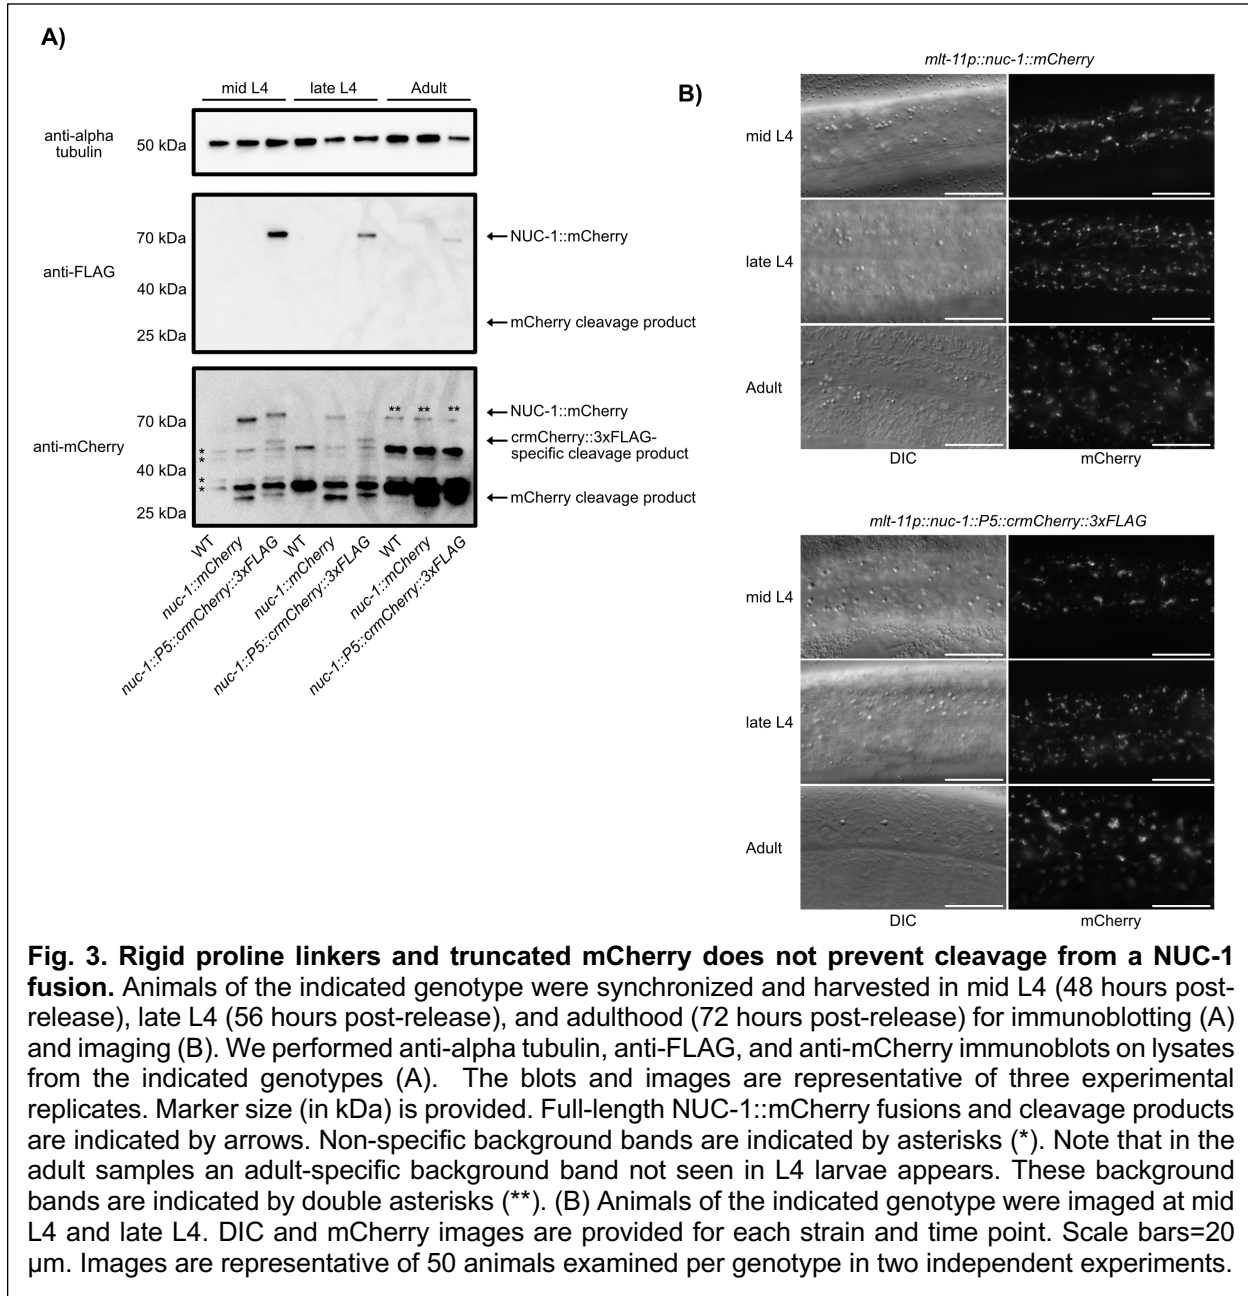

233  
 234 **The NUC-1 FLAG epitope is not recognized in immunoblotting after extended time**  
 235 **in the lysosome**  
 236 In our FLAG immunoblots, the full-length NUC-1::P5::crmCherry::3xFLAG product  
 237 declined in intensity in late L4 and adult animals and we did not observe a band at the

238 expected cleavage product position (Fig. 3A). In contrast, in the anti-mCherry  
239 immunoblots the cleavage product increased in intensity in late L4 and adult animals. *mlt-*  
240 *11* mRNA levels oscillate and the promoter shuts off in mid-L4, so we are monitoring  
241 NUC-1::mCherry and NUC-1::P5::crmCherry::3xFLAG produced by the last pulse of gene  
242 expression driven by the *mlt-11* promoter (Frand *et al.* 2005; Hendriks *et al.* 2014; Meeuse  
243 *et al.* 2020). These data suggest that FLAG epitope is not recognized in the cleaved  
244 mCherry fragment, an important consideration in interpreting anti-FLAG immunoblots.

245

### 246 **The green FP Gamillus is not quenched in *C. elegans* lysosomes**

247 Another limitation of FP usage in lysosomes is that many green FPs are quenched and  
248 degraded. The quenching could produce a false negative for lysosomal expression of a  
249 fusion protein. As co-localization studies frequently rely on red and green FPs, we sought  
250 alternate green FPs for lysosomal imaging. Two candidates from the literature were pH-  
251 tdGFP and Gamillus. pH-tdGFP is an engineered tandem dimer which is acid-tolerant and  
252 stable *in vitro* over a pH range from 3.75-8.50 (Roberts *et al.* 2016). However, we did not  
253 pursue this green FP as the tandem dimer would make it a large insertion for knock-ins  
254 which could decrease editing efficiency. Gamillus is an acid tolerant monomeric green FP  
255 developed through directed evolution of a novel green FP from the flower hat jellyfish,  
256 *Olindias formosa* (Shinoda *et al.* 2018a). It has a pKA of 3.4 and is reported to have  
257 desirable brightness, photostability, and maturation speed (Shinoda *et al.* 2018a).  
258 Gamillus is photoswitchable; at its peak excitation wavelength of 504 nm it is switched to  
259 an off state which could be reversed by irradiation with 352-388 nm light (Shinoda *et al.*  
260 2018a). Excitation in the 440-480 nm range produced negligible photochromism,  
261 potentially due to a higher on-switching rate (Shinoda *et al.* 2018a).

262

263

264 To test whether Gamillus performs well in *C. elegans* lysosomes, we created a heat  
265 shock-inducible *nuc-1::mCherry::Gamillus* transgene. Gamillus and mCherry co-localized  
266 in lysosomes 24 hours post-heat shock including in tubular, acidified lysosomes (Figure  
267 4A). This result is in contrast to NUC-1::sfGFP::mCherry, where the sfGFP is quenched  
268 over time by the acidic lysosomal environment and there is no co-localization 24 hours

269

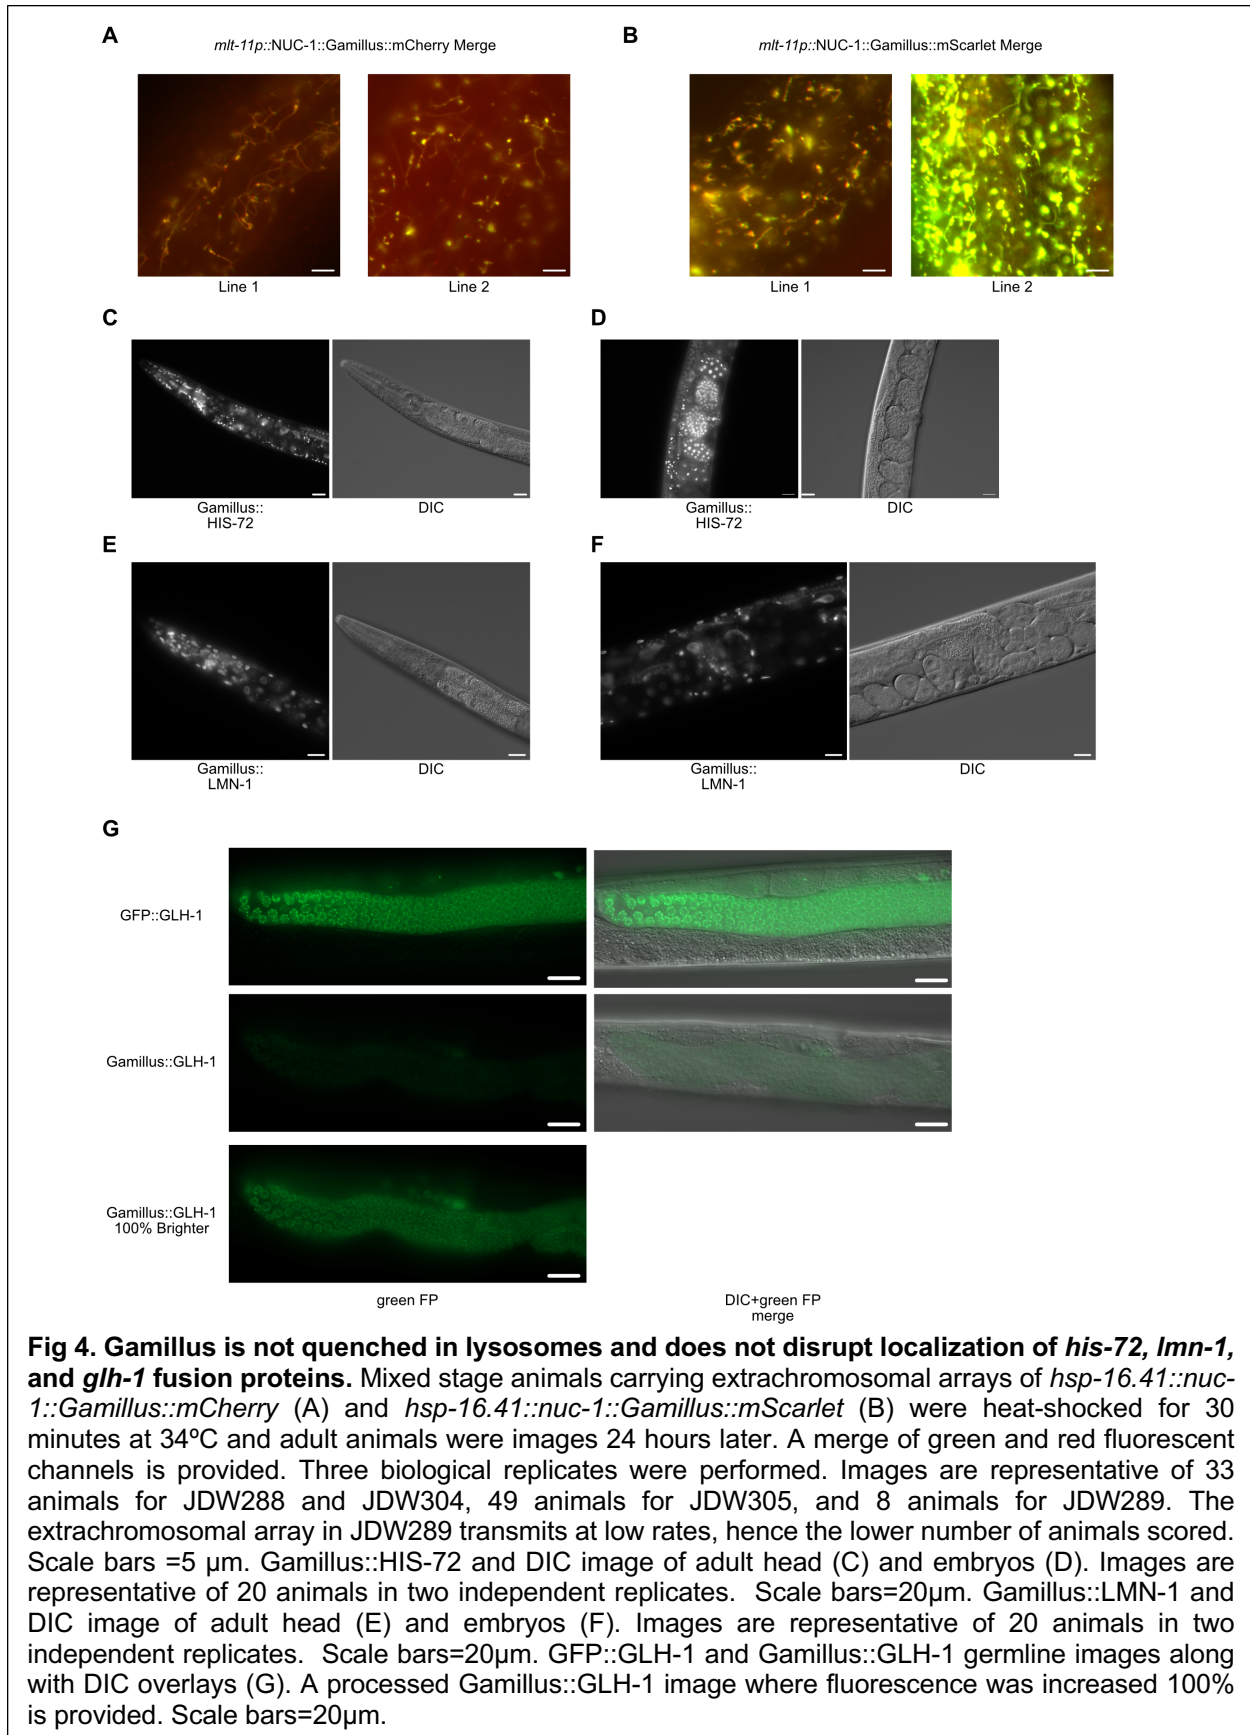

270 post-heat shock (Miao *et al.* 2020). As the pKa of mScarlet is higher than that of mCherry  
271 (pKA 5.3 vs.3.1), we used this approach to test whether mScarlet is quenched by the  
272 lysosomal environment. We constructed a heat shock-inducible *nuc-*  
273 *1::mScarlet::Gamillus* and demonstrated that mScarlet and Gamillus also co-localized,  
274 suggesting that mScarlet is not quenched or degraded in the lysosome (Figure 4B).

275

276 We next tested whether Gamillus affects the function of proteins to which it is fused, using  
277 proteins sensitive to tag dimerization. We used CRISPR to knock Gamillus coding  
278 sequence into a histone H3B (*his-72*) and lamin (*lmn-1*). We also tagged a germline  
279 helicase that localizes to P granules, which are found in ribonucleoprotein condensates.  
280 We observed the expected chromatin (*his-72*), nuclear envelope (*lmn-1*), and perinuclear  
281 (*glh-1*) localization for each fusion (Figure 4C-G). Notably, Gamillus::GLH-1 knock-ins  
282 were dimmer than GFP knock-ins, consistent with the need to image Gamillus at a  
283 wavelength that produces 50% excitation to avoid photoconversion (Fig. 4G; Shinoda *et*  
284 *al.* 2018a). These data suggest that Gamillus does not cause mislocalization and  
285 validates the FP for tagging proteins by CRISPR-mediated genome editing. Together,  
286 these results validate Gamillus as a green FP option for studying lysosome luminal  
287 proteins.

288

## 289 **DISCUSSION**

290 Similar to our findings with MLT-11 (Fig. 1; Ragle *et al.* 2022), different localization  
291 patterns of green and red FP fusions have been reported for other *C. elegans* aECM  
292 factors such as MLT-10, NOAH-1, and PTR-4 (Meli *et al.* 2010; Cohen *et al.* 2019, 2021;  
293 Johnson *et al.* 2022). Lysosomal localization poses different issues for green and red FP  
294 fusions. Green FP degradation and/or quenching could create false negatives for  
295 lysosomal localization. Conversely, the stability of red FPs in the lysosome could allow a  
296 cleaved red FP tag to accumulate in the absence of the fusion protein, creating a false  
297 positive for lysosomal localization of a factor of interest. Additionally, the bright lysosomal  
298 signal can produce high background, obscuring dimmer localization of a translational  
299 fusion of a protein of interest in other tissues or cellular compartments. Determining the  
300 extent of FP cleavage by western blotting is a critical control to interpret any lysosomal

301 localization of fusion proteins. Our data also suggest that FLAG epitopes become  
302 unrecognizable by anti-FLAG antibodies after extended time in lysosomal environments  
303 (Fig. 3). We observed a similar phenomenon with MLT-11::mNeonGreen::3xFLAG where  
304 in late L4 larvae and early adulthood we observed lysosomal localization but no signal by  
305 anti-FLAG immunoblotting (Ragle *et al.* 2022). These results are likely due to degradation  
306 of the epitope by lysosomal proteases, though we cannot rule out post-translational  
307 modification of the FLAG tag in the lysosome that prevents antibody binding. Using  
308 antibodies against FPs may be preferable to use in immunoblotting as if there is  
309 fluorescent signal in animals then one can test whether the fusion protein is full-length.  
310 While the rigid proline linker and mCherry N-terminal truncation did not reduce mCherry  
311 cleavage from NUC-1, it is possible that they may work on other proteins.

312

313 We also validated Gamillus as a green FP for labeling the lysosome lumen and for fusion  
314 to lysosomal proteins. When fused to NUC-1, it displayed similar co-localization and acid-  
315 tolerance as mCherry. We also confirmed that despite its higher pKA than mCherry,  
316 mScarlet is acid-tolerant making it suitable for lysosomal experiments. Gamillus also  
317 exhibits photoswitching behavior at its peak excitation wavelength; however, if non-peak  
318 excitation wavelength (440-480 nm) is used the switch to the off-state is minimized at the  
319 cost of brightness (Shinoda *et al.* 2018a).

320

## 321 **ACKNOWLEDGEMENTS**

322 We thank D. Kellogg for helpful discussions. This work was funded by the National  
323 Institutes of Health (NIH) National Institute of General Medical Sciences (NIGMS) [R01  
324 GM138701] to J.D.W. Some strains were provided by the Caenorhabditis Genetics  
325 Center, which is funded by the NIH Office of Research Infrastructure Programs [P40  
326 OD010440]. The anti-alpha tubulin 12G10 monoclonal antibody developed by J. Frankel  
327 and E.M. Nelson of the University of Iowa was obtained from the Developmental Studies  
328 Hybridoma Bank, created by the NICHD of the NIH and maintained at The University of  
329 Iowa, Department of Biology, Iowa City, IA 52242.

330

331



332 **REFERENCES**

- 333 Ashley, G. E., T. Duong, M. T. Levenson, M. A. Q. Martinez, L. C. Johnson *et al.*, 2021  
334 An expanded auxin-inducible degron toolkit for *Caenorhabditis elegans*. *Genetics*  
335 217: iyab006.
- 336 Ballabio, A., and J. S. Bonifacino, 2020 Lysosomes as dynamic regulators of cell and  
337 organismal homeostasis. *Nat. Rev. Mol. Cell Biol.* 21: 101–118.
- 338 Bonam, S. R., F. Wang, and S. Muller, 2019 Lysosomes as a therapeutic target. *Nat.*  
339 *Rev. Drug Discov.* 18: 923–948.
- 340 Brenner, S., 1974 The genetics of *Caenorhabditis elegans*. *Genetics* 77: 71–94.
- 341 Church, D. L., K. L. Guan, and E. J. Lambie, 1995 Three genes of the MAP kinase  
342 cascade, *mek-2*, *mpk-1/sur-1* and *let-60 ras*, are required for meiotic cell cycle  
343 progression in *Caenorhabditis elegans*. *Development* 121: 2525–2535.
- 344 Cohen, J. D., C. E. Cadena del Castillo, N. D. Serra, A. Kaech, A. Spang *et al.*, 2021  
345 The *Caenorhabditis elegans* Patched domain protein PTR-4 is required for  
346 proper organization of the precuticular apical extracellular matrix. *Genetics*.
- 347 Cohen, J. D., K. M. Flatt, N. E. Schroeder, and M. V. Sundaram, 2019 Epithelial  
348 Shaping by Diverse Apical Extracellular Matrices Requires the Nidogen Domain  
349 Protein DEX-1 in *Caenorhabditis elegans*. *Genetics* 211: 185–200.
- 350 Dickinson, D. J., A. M. Pani, J. K. Heppert, C. D. Higgins, and B. Goldstein, 2015  
351 Streamlined Genome Engineering with a Self-Excising Drug Selection Cassette.  
352 *Genetics* 200: 1035–1049.
- 353 Frand, A. R., S. Russel, and G. Ruvkun, 2005 Functional Genomic Analysis of *C.*  
354 *elegans* Molting. *PLoS Biol.* 3: e312.
- 355 Frøkjaer-Jensen, C., M. W. Davis, C. E. Hopkins, B. J. Newman, J. M. Thummel *et al.*,  
356 2008 Single-copy insertion of transgenes in *Caenorhabditis elegans*. *Nat. Genet.*  
357 40: 1375–1383.
- 358 Hansen, M., A. Chandra, L. L. Mitic, B. Onken, M. Driscoll *et al.*, 2008 A role for  
359 autophagy in the extension of lifespan by dietary restriction in *C. elegans*. *PLoS*  
360 *Genet.* 4: e24.
- 361 Hendriks, G.-J., D. Gaidatzis, F. Aeschmann, and H. Großhans, 2014 Extensive  
362 oscillatory gene expression during *C. elegans* larval development. *Mol. Cell* 53:

- 363 380–392.
- 364 Huang, L., D. Pike, D. E. Sleat, V. Nanda, and P. Lobel, 2014 Potential Pitfalls and  
365 Solutions for Use of Fluorescent Fusion Proteins to Study the Lysosome. PLOS  
366 ONE 9: e88893.
- 367 Johnson, L. C., A. A. Vo, J. C. Clancy, J. D. Aguilera, M. T. Levenson *et al.*, 2022 NHR-  
368 23 activity is necessary for developmental progression and apical extracellular  
369 matrix structure and function. 2021.10.27.465992.
- 370 Ko, D. C., J. Binkley, A. Sidow, and M. P. Scott, 2003 The integrity of a cholesterol-  
371 binding pocket in Niemann-Pick C2 protein is necessary to control lysosome  
372 cholesterol levels. Proc. Natl. Acad. Sci. U. S. A. 100: 2518–2525.
- 373 Kollmann, K., K. E. Mutenda, M. Balleiningger, E. Eckermann, K. von Figura *et al.*, 2005  
374 Identification of novel lysosomal matrix proteins by proteome analysis.  
375 Proteomics 5: 3966–3978.
- 376 Meeuse, M. W., Y. P. Hauser, L. J. Morales Moya, G. Hendriks, J. Eglinger *et al.*, 2020  
377 Developmental function and state transitions of a gene expression oscillator in  
378 *Caenorhabditis elegans*. Mol. Syst. Biol. 16:.
- 379 Meli, V. S., B. Osuna, G. Ruvkun, and A. R. Frand, 2010 MLT-10 Defines a Family of  
380 DUF644 and Proline-Rich Repeat Proteins Involved in the Molting Cycle of  
381 *Caenorhabditis elegans*. Mol. Biol. Cell 21: 1648–1661.
- 382 Miao, R., M. Li, Q. Zhang, C. Yang, and X. Wang, 2020 An ECM-to-Nucleus Signaling  
383 Pathway Activates Lysosomes for *C. elegans* Larval Development. Dev. Cell 52:  
384 21-37.e5.
- 385 Mok, D. Z. L., P. W. Sternberg, and T. Inoue, 2015 Morphologically defined sub-stages  
386 of *C. elegans* vulval development in the fourth larval stage. BMC Dev. Biol. 1–8.
- 387 Nonet, M. L., 2020 Efficient Transgenesis in *Caenorhabditis elegans* Using Flp  
388 Recombinase-Mediated Cassette Exchange. Genetics 215: 903–921.
- 389 Ragle, J. M., M. T. Levenson, J. C. Clancy, A. A. Vo, V. Pham *et al.*, 2022 The  
390 conserved, secreted protease inhibitor MLT-11 is necessary for *C. elegans*  
391 molting and embryogenesis. 2022.06.29.498124.
- 392 Roberts, T. M., F. Rudolf, A. Meyer, R. Pellaux, E. Whitehead *et al.*, 2016 Identification  
393 and Characterisation of a pH-stable GFP. Sci. Rep. 6: 28166.

394 Schwartz, M. L., and E. M. Jorgensen, 2016 SapTrap, a Toolkit for High-Throughput  
395 CRISPR/Cas9 Gene Modification in *Caenorhabditis elegans*. *Genetics* 202:  
396 1277–1288.

397 Shinoda, H., Y. Ma, R. Nakashima, K. Sakurai, T. Matsuda *et al.*, 2018a Acid-Tolerant  
398 Monomeric GFP from *Olindias formosa*. *Cell Chem. Biol.* 25: 330-338.e7.

399 Shinoda, H., M. Shannon, and T. Nagai, 2018b Fluorescent Proteins for Investigating  
400 Biological Events in Acidic Environments. *Int. J. Mol. Sci.* 19:.

401 Sun, Y., M. Li, D. Zhao, X. Li, C. Yang *et al.*, 2020 Lysosome activity is modulated by  
402 multiple longevity pathways and is important for lifespan extension in *C. elegans*.  
403 *eLife* 9: e55745.

404

405

406

407

408

409

410

411

412

413

414
